# Supplementary material for: AB-stacked square-like bilayer ice in graphene nanocapillaries
Source: Royal Society of Chemistry journal article supplement (doi:10.1039/c6cp03061k), 2016-01-01
Supplement: c6cp03061k1.pdf [file c6cp03061k1.pdf]

## **Electronic Supplemental Information**

### **AB-Stacked Square-like Bilayer Ice in Graphene Nanocapillaries**

YinBo Zhu<sup>1</sup>, FengChao Wang<sup>1</sup>, Jaeil Bai<sup>2</sup>, Xiao Cheng Zeng<sup>2,3\*</sup>, HengAn Wu<sup>1,\*</sup>

<sup>1</sup>CAS Key Laboratory of Mechanical Behavior and Design of Materials, Department of Modern Mechanics, CAS Center for Excellence in Nanoscience, University of Science and Technology of China, Hefei, Anhui 230027, China

<sup>2</sup>Department of Chemistry, University of Nebraska-Lincoln, NE 68588, USA

<sup>3</sup>Hefei National Laboratory for Physical Sciences at Microscale and Collaborative Innovation Center of Chemistry for Energy Materials, University of Science and Technology of China, Hefei, Anhui 230026, China

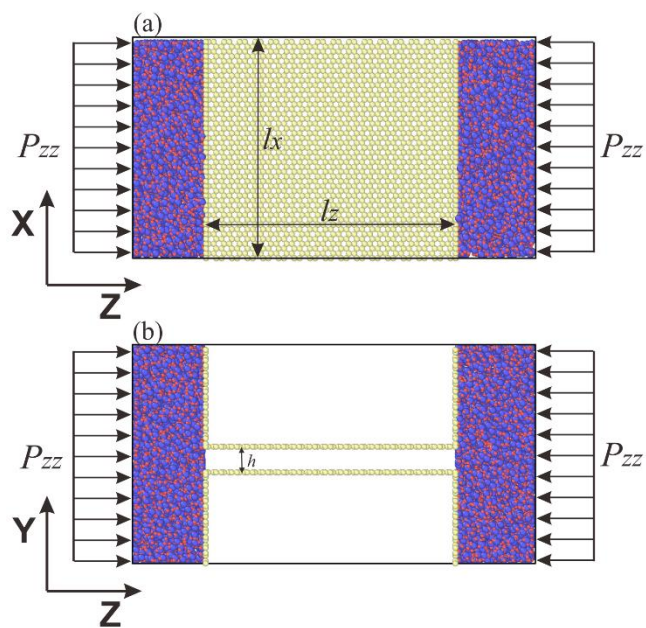

**Figure S1.** Configuration of simulation model: xz plane (a) and yz plane (b), similar to that shown in the Ref. 12. The red, blue, and yellow balls denote the hydrogen, oxygen, and carbon atoms, respectively. The black rectangle frame is the simulation box.
